# Supplementary material
Source: PubMed Central journal article supplement (PMC6520046)
Supplement: nmy129_supplemental_file.pdf [file nmy129_supplemental_file.pdf]

Supplemental Table 1. Algorithm search for miRNA and CR

| miRNA            | %CR                       | Tissue        | Change by CR* | Ref. |
|------------------|---------------------------|---------------|---------------|------|
| cel-miR-1824-5p  | 2-day fasting             | Whole animals | Downregulated | (1)  |
| cel-miR-1829b    | 2-day fasting             | Whole animals | Downregulated | (1)  |
| cel-miR-2210-5p  | 2-day fasting             | Whole animals | Downregulated | (1)  |
| cel-miR-2221     | 2-day fasting             | Whole animals | Downregulated | (1)  |
| cel-miR-239a-5p  | 2-day fasting             | Whole animals | Downregulated | (1)  |
| cel-miR-243-3p   | 2-day fasting             | Whole animals | Downregulated | (1)  |
| cel-miR-259-3p   | 2-day fasting             | Whole animals | Downregulated | (1)  |
| cel-miR-259-5p   | 2-day fasting             | Whole animals | Downregulated | (1)  |
| cel-miR-35-5p    | 2-day fasting             | Whole animals | Downregulated | (1)  |
| cel-miR-38-5p    | 2-day fasting             | Whole animals | Downregulated | (1)  |
| cel-miR-40-5p    | 2-day fasting             | Whole animals | Downregulated | (1)  |
| cel-miR-43-3p    | 2-day fasting             | Whole animals | Downregulated | (1)  |
| cel-miR-4809-3p  | 2-day fasting             | Whole animals | Downregulated | (1)  |
| cel-miR-4936     | 2-day fasting             | Whole animals | Downregulated | (1)  |
| cel-miR-49-5p    | 2-day fasting             | Whole animals | Downregulated | (1)  |
| cel-miR-50-3p    | 2-day fasting             | Whole animals | Downregulated | (1)  |
| cel-miR-52-3p    | 2-day fasting             | Whole animals | Downregulated | (1)  |
| cel-miR-55-5p    | 2-day fasting             | Whole animals | Downregulated | (1)  |
| cel-miR-5592-3p  | 2-day fasting             | Whole animals | Downregulated | (1)  |
| cel-miR-5592-5p  | 2-day fasting             | Whole animals | Downregulated | (1)  |
| cel-miR-58b-5p   | 2-day fasting             | Whole animals | Downregulated | (1)  |
| cel-miR-63-3p    | 2-day fasting             | Whole animals | Downregulated | (1)  |
| cel-miR-75-3p    | 2-day fasting             | Whole animals | Downregulated | (1)  |
| cel-miR-75-5p    | 2-day fasting             | Whole animals | Downregulated | (1)  |
| cel-miR-784-3p   | 2-day fasting             | Whole animals | Downregulated | (1)  |
| cel-miR-789      | 2-day fasting             | Whole animals | Downregulated | (1)  |
| cel-miR-791-5p   | 2-day fasting             | Whole animals | Downregulated | (1)  |
| cel-miR-79-3p    | 2-day fasting             | Whole animals | Downregulated | (1)  |
| cel-miR-80-5p    | 2-day fasting             | Whole animals | Downregulated | (1)  |
| cel-miR-83-5p    | 2-day fasting             | Whole animals | Downregulated | (1)  |
| cel-miR-1832b-3p | 2-day fasting             | Whole animals | Downregulated | (1)  |
| cel-miR-4808-5p  | 2-day fasting             | Whole animals | Downregulated | (1)  |
| cel-let-7-3p     | 12-hr starvation          | Whole animals | Downregulated | (2)  |
| cel-mir-79       | 12-hr starvation          | Whole animals | Downregulated | (2)  |
| cel-mir-85       | 12-hr starvation          | Whole animals | Downregulated | (2)  |
| cel-miR-85-5p    | 12-hr starvation          | Whole animals | Downregulated | (2)  |
| dme-miR-305      | 24-hr, 72hr starved media | Whole animals | Downregulated | (3)  |
| mmu-miR-126-5p   | 40% CR                    | Serum         | Downregulated | (4)  |
| mmu-miR-127-3p   | 40% CR                    | Serum         | Downregulated | (4)  |
| mmu-miR-136-3p   | 40% CR                    | Serum         | Downregulated | (4)  |
| mmu-miR-139-5p   | 40% CR                    | Serum         | Downregulated | (4)  |
| mmu-miR-194-5p   | 40% CR                    | Serum         | Downregulated | (4)  |
| mmu-miR-27b-3p   | 40% CR                    | Serum         | Downregulated | (4)  |
| mmu-miR-29c-3p   | 40% CR                    | Serum         | Downregulated | (4)  |
| mmu-miR-322-3p   | 40% CR                    | Serum         | Downregulated | (4)  |
| mmu-miR-335-5p   | 40% CR                    | Serum         | Downregulated | (4)  |
| mmu-miR-34a-5p   | 40% CR                    | Serum         | Downregulated | (4)  |
| mmu-miR-381-3p   | 40% CR                    | Serum         | Downregulated | (4)  |
| mmu-miR-411-5p   | 40% CR                    | Serum         | Downregulated | (4)  |
| mmu-miR-434-5p   | 40% CR                    | Serum         | Downregulated | (4)  |
| mmu-miR-540-3p   | 40% CR                    | Serum         | Downregulated | (4)  |
| mmu-miR-541-5p   | 40% CR                    | Serum         | Downregulated | (4)  |
| mmu-miR-101a-3p  | 40% CR                    | Liver         | Downregulated | (5)  |
| mmu-miR-101b-3p  | 40% CR                    | Liver         | Downregulated | (5)  |
| mmu-miR-106b-5p  | 40% CR                    | Liver         | Downregulated | (5)  |
| mmu-miR-107-3p   | 40% CR                    | Liver         | Downregulated | (5)  |
| mmu-miR-122-5p   | 40% CR                    | Liver         | Downregulated | (5)  |
| mmu-miR-125a-3p  | 40% CR                    | Liver         | Downregulated | (5)  |
| mmu-miR-142-3p   | 40% CR                    | Liver         | Downregulated | (5)  |
| mmu-miR-148a-3p  | 40% CR                    | Liver         | Downregulated | (5)  |
| mmu-miR-152-3p   | 40% CR                    | Liver         | Downregulated | (5)  |
| mmu-miR-15a-5p   | 40% CR                    | Liver         | Downregulated | (5)  |

## Supplementary data

|                     |                                  |               |               |     |
|---------------------|----------------------------------|---------------|---------------|-----|
| mmu-miR-192-5p      | 40% CR                           | Liver         | Downregulated | (5) |
| mmu-miR-1937b_v16.0 | 40% CR                           | Liver         | Downregulated | (5) |
| mmu-miR-1937c_v16.0 | 40% CR                           | Liver         | Downregulated | (5) |
| mmu-miR-1939_v16.0  | 40% CR                           | Liver         | Downregulated | (5) |
| mmu-miR-193a-3p     | 40% CR                           | Liver         | Downregulated | (5) |
| mmu-miR-19b-3p      | 40% CR                           | Liver         | Downregulated | (5) |
| mmu-miR-203-3p      | 40% CR                           | Liver         | Downregulated | (5) |
| mmu-miR-212-3p      | 40% CR                           | Liver         | Downregulated | (5) |
| mmu-miR-21a-5p      | 40% CR                           | Liver         | Downregulated | (5) |
| mmu-miR-26b-5p      | 40% CR                           | Liver         | Downregulated | (5) |
| mmu-miR-27b-3p      | 40% CR                           | Liver         | Downregulated | (5) |
| mmu-miR-29b-3p      | 40% CR                           | Liver         | Downregulated | (5) |
| mmu-miR-29c-3p      | 40% CR                           | Liver         | Downregulated | (5) |
| mmu-miR-30a-5p      | 40% CR                           | Liver         | Downregulated | (5) |
| mmu-miR-30e-5p      | 40% CR                           | Liver         | Downregulated | (5) |
| mmu-miR-34a-5p      | 40% CR                           | Liver         | Downregulated | (5) |
| mmu-miR-466f-3p     | 40% CR                           | Liver         | Downregulated | (5) |
| mmu-miR-5097        | 40% CR                           | Liver         | Downregulated | (5) |
| mmu-miR-720_v18.0   | 40% CR                           | Liver         | Downregulated | (5) |
| mmu-miR-155         | 30% CR                           | Colon mucosa  | Downregulated | (6) |
| mmu-miR-30e         | 40% CR                           | brain         | Downregulated | (7) |
| mmu-miR-34a         | 40% CR                           | brain         | Downregulated | (7) |
| mmu-miR-181a-1*     | 40% CR                           | brain         | Downregulated | (7) |
| mmu-miR-200a        | 30% CR                           | breast tissue | Downregulated | (8) |
| mml-miR-106b-5p     | 30% restriction, starting at 10% | Plasma        | Downregulated | (9) |
| mml-miR-125a-5p     | 30% restriction, starting at 10% | Plasma        | Downregulated | (9) |
| mml-miR-125b-5p     | 30% restriction, starting at 10% | Plasma        | Downregulated | (9) |
| mml-miR-133b-5p     | 30% restriction, starting at 10% | Plasma        | Downregulated | (9) |
| mml-miR-133c-5p     | 30% restriction, starting at 10% | Plasma        | Downregulated | (9) |
| mml-miR-143-5p      | 30% restriction, starting at 10% | Plasma        | Downregulated | (9) |
| mml-miR-16-5p       | 30% restriction, starting at 10% | Plasma        | Downregulated | (9) |
| mml-miR-182         | 30% restriction, starting at 10% | Plasma        | Downregulated | (9) |
| mml-miR-20a-5p      | 30% restriction, starting at 10% | Plasma        | Downregulated | (9) |
| mml-miR-224-5p      | 30% restriction, starting at 10% | Plasma        | Downregulated | (9) |
| mml-miR-92a-3p      | 30% restriction, starting at 10% | Plasma        | Downregulated | (9) |
| mml-miR-486-5p      | 30% restriction, starting at 10% | Plasma        | Downregulated | (9) |
| mmu-miR-100-5p      | 40% CR                           | Serum         | Downregulated | (4) |
| cel-miR-1822-5p     | 2-day fasting                    | Whole animals | Upregulated   | (1) |
| cel-miR-34-3p       | 2-day fasting                    | Whole animals | Upregulated   | (1) |
| cel-miR-1817        | 2-day fasting                    | Whole animals | Upregulated   | (1) |
| cel-miR-4810        | 2-day fasting                    | Whole animals | Upregulated   | (1) |
| cel-miR-64-3p       | 2-day fasting                    | Whole animals | Upregulated   | (1) |
| cel-miR-5552-3p     | 2-day fasting                    | Whole animals | Upregulated   | (1) |
| cel-miR-796         | 2-day fasting                    | Whole animals | Upregulated   | (1) |
| cel-miR-253-5p      | 2-day fasting                    | Whole animals | Upregulated   | (1) |
| cel-miR-359         | 2-day fasting                    | Whole animals | Upregulated   | (1) |
| cel-miR-266         | 2-day fasting                    | Whole animals | Upregulated   | (1) |
| cel-miR-2210-3p     | 2-day fasting                    | Whole animals | Upregulated   | (1) |
| cel-miR-1823        | 2-day fasting                    | Whole animals | Upregulated   | (1) |
| cel-miR-1829a-5p    | 2-day fasting                    | Whole animals | Upregulated   | (1) |
| cel-miR-1832a       | 2-day fasting                    | Whole animals | Upregulated   | (1) |
| cel-miR-255-3p      | 2-day fasting                    | Whole animals | Upregulated   | (1) |
| cel-miR-4812-5p     | 2-day fasting                    | Whole animals | Upregulated   | (1) |
| cel-miR-235-5p      | 2-day fasting                    | Whole animals | Upregulated   | (1) |
| cel-miR-2214-5p     | 2-day fasting                    | Whole animals | Upregulated   | (1) |
| cel-miR-797-5p      | 2-day fasting                    | Whole animals | Upregulated   | (1) |
| cel-miR-798         | 2-day fasting                    | Whole animals | Upregulated   | (1) |
| cel-miR-39-3p       | 12-hr starvation                 | Whole animals | Upregulated   | (2) |
| cel-miR-37-3p       | 12-hr starvation                 | Whole animals | Upregulated   | (2) |
| cel-miR-35-3p       | 12-hr starvation                 | Whole animals | Upregulated   | (2) |
| cel-miR-38-3p       | 12-hr starvation                 | Whole animals | Upregulated   | (2) |
| cel-miR-41-3p       | 12-hr starvation                 | Whole animals | Upregulated   | (2) |
| cel-miR-36-3p       | 12-hr starvation                 | Whole animals | Upregulated   | (2) |
| cel-miR-4813-5p     | 12-hr starvation                 | Whole animals | Upregulated   | (2) |
| cel-miR-40-3p       | 12-hr starvation                 | Whole animals | Upregulated   | (2) |
| cel-miR-34-3p       | 12-hr starvation                 | Whole animals | Upregulated   | (2) |

## Supplementary data

|                    |                              |               |             |      |
|--------------------|------------------------------|---------------|-------------|------|
| cel-miR-41-5p      | 12-hr starvation             | Whole animals | Upregulated | (2)  |
| cel-mir-35         | 12-hr starvation             | Whole animals | Upregulated | (2)  |
| cel-miR-359        | 12-hr starvation             | Whole animals | Upregulated | (2)  |
| cel-miR-39-5p      | 12-hr starvation             | Whole animals | Upregulated | (2)  |
| cel-miR-240-5p     | 12-hr starvation             | Whole animals | Upregulated | (2)  |
| cel-miR-246-3p     | 12-hr starvation             | Whole animals | Upregulated | (2)  |
| dme-mir-184        | High to low energy switch    | Whole animals | Upregulated | (10) |
| dme-let-7          | High to low energy switch    | Whole animals | Upregulated | (10) |
| dme-mir-125        | High to low energy switch    | Whole animals | Upregulated | (10) |
| dme-mir-100        | High to low energy switch    | Whole animals | Upregulated | (10) |
| mmu-miR-150        | 30% CR                       | Colon mucosa  | Upregulated | (6)  |
| mmu-miR-351        | 30% CR                       | Colon mucosa  | Upregulated | (6)  |
| mmu-miR-16         | 30% CR                       | Colon mucosa  | Upregulated | (6)  |
| mmu-let-7f         | 30% CR                       | Colon mucosa  | Upregulated | (6)  |
| mmu-miR-34c        | 30% CR                       | Colon mucosa  | Upregulated | (6)  |
| mmu-miR-29c        | 30% CR                       | breast tissue | Upregulated | (11) |
| mmu-miR-203        | 30% CR                       | breast tissue | Upregulated | (11) |
| mmu-miR-150        | 30% CR                       | breast tissue | Upregulated | (11) |
| mmu-miR-30         | 30% CR                       | breast tissue | Upregulated | (11) |
| mmu-miR-139-5p     | 40% CR                       | Liver         | Upregulated | (5)  |
| mmu-miR-92a-3p     | 40% CR                       | Liver         | Upregulated | (5)  |
| mmu-miR-338-5p     | 40% CR                       | Liver         | Upregulated | (5)  |
| mmu-miR-1187       | 40% CR                       | Liver         | Upregulated | (5)  |
| mmu-let-7c-5p      | 40% CR                       | Liver         | Upregulated | (5)  |
| mmu-miR-125b-5p    | 40% CR                       | Liver         | Upregulated | (5)  |
| mmu-let-7b-5p      | 40% CR                       | Liver         | Upregulated | (5)  |
| mmu-miR-1944_v16.0 | 40% CR                       | Liver         | Upregulated | (5)  |
| mmu-miR-1906       | 40% CR                       | Liver         | Upregulated | (5)  |
| mmu-miR-574-5p     | 40% CR                       | Liver         | Upregulated | (5)  |
| mmu-miR-2134_v15.0 | 40% CR                       | Liver         | Upregulated | (5)  |
| mmu-miR-2133_v15.0 | 40% CR                       | Liver         | Upregulated | (5)  |
| mmu-miR-2141_v15.0 | 40% CR                       | Liver         | Upregulated | (5)  |
| mmu-miR-2135_v15.0 | 40% CR                       | Liver         | Upregulated | (5)  |
| mmu-miR-2146_v15.0 | 40% CR                       | Liver         | Upregulated | (5)  |
| mmu-miR-486-3p     | 40% CR                       | Serum         | Upregulated | (4)  |
| mmu-miR-3107-3p    | 40% CR                       | Serum         | Upregulated | (4)  |
| mmu-miR-34b-5p     | Young vs. old vs. CR (no CR) | Serum         | Upregulated | (12) |
| mmu-miR-344d-2-5p  | Young vs. old vs. CR (no CR) | Serum         | Upregulated | (12) |
| mmu-miR-592-5p     | Young vs. old vs. CR (no CR) | Serum         | Upregulated | (12) |
| mmu-mir-136        | Young vs. old vs. CR (no CR) | Serum         | Upregulated | (12) |
| mmu-mir-127        | Young vs. old vs. CR (no CR) | Serum         | Upregulated | (12) |
| mmu-miR-540        | Young vs. old vs. CR (no CR) | Serum         | Upregulated | (12) |
| mmu-miR-449        | Young vs. old vs. CR (no CR) | Serum         | Upregulated | (12) |
| mmu-miR-379        | Young vs. old vs. CR (no CR) | Serum         | Upregulated | (12) |
| mmu-miR-5107       | Young vs. old vs. CR (no CR) | Serum         | Upregulated | (12) |
| mmu-miR-146        | Young vs. old vs. CR (no CR) | Serum         | Upregulated | (12) |
| mmu-miR-342        | Young vs. old vs. CR (no CR) | Serum         | Upregulated | (12) |
| mmu-miR-368        | Young vs. old vs. CR (no CR) | Serum         | Upregulated | (12) |
| mmu-miR-154        | Young vs. old vs. CR (no CR) | Serum         | Upregulated | (12) |
| mmu-mir-15         | Young vs. old vs. CR (no CR) | Serum         | Upregulated | (12) |
| mmu-miR-34c-5p     | Young vs. old vs. CR (no CR) | Serum         | Upregulated | (12) |
| rno-miR-667        | lifelong 40% CR              | CEVC          | Upregulated | (13) |
| rno-miR-383        | lifelong 40% CR              | CEVC          | Upregulated | (13) |
| rno-miR-328a       | lifelong 40% CR              | CEVC          | Upregulated | (13) |
| rno-let-7b         | lifelong 40% CR              | CEVC          | Upregulated | (13) |
| rno-miR-92a        | lifelong 40% CR              | CEVC          | Upregulated | (13) |
| rno-miR-532-3p     | lifelong 40% CR              | CEVC          | Upregulated | (13) |
| rno-miR-181c       | lifelong 40% CR              | CEVC          | Upregulated | (13) |
| rno-miR-145        | lifelong 40% CR              | CEVC          | Upregulated | (13) |
| rno-let-7c         | lifelong 40% CR              | CEVC          | Upregulated | (13) |
| rno-miR-329        | lifelong 40% CR              | CEVC          | Upregulated | (13) |
| rno-miR-23a        | lifelong 40% CR              | CEVC          | Upregulated | (13) |
| rno-miR-214        | lifelong 40% CR              | CEVC          | Upregulated | (13) |
| rno-miR-125b-5p    | lifelong 40% CR              | CEVC          | Upregulated | (13) |
| rno-miR-15b        | lifelong 40% CR              | CEVC          | Upregulated | (13) |
| rno-let-7e         | lifelong 40% CR              | CEVC          | Upregulated | (13) |

## Supplementary data

|                 |                                                                        |        |             |      |
|-----------------|------------------------------------------------------------------------|--------|-------------|------|
| rno-miR-181a    | lifelong 40% CR                                                        | CEVC   | Upregulated | (13) |
| rno-miR-221     | lifelong 40% CR                                                        | CEVC   | Upregulated | (13) |
| rno-let-7d      | lifelong 40% CR                                                        | CEVC   | Upregulated | (13) |
| rno-miR-34a     | lifelong 40% CR                                                        | CEVC   | Upregulated | (13) |
| rno-miR-24      | lifelong 40% CR                                                        | CEVC   | Upregulated | (13) |
| rno-miR-872     | lifelong 40% CR                                                        | CEVC   | Upregulated | (13) |
| rno-miR-29a     | lifelong 40% CR                                                        | CEVC   | Upregulated | (13) |
| rno-miR-140     | lifelong 40% CR                                                        | CEVC   | Upregulated | (13) |
| rno-miR-301a    | lifelong 40% CR                                                        | CEVC   | Upregulated | (13) |
| rno-miR-30c     | lifelong 40% CR                                                        | CEVC   | Upregulated | (13) |
| rno-miR-30b     | lifelong 40% CR                                                        | CEVC   | Upregulated | (13) |
| rno-miR-27a     | lifelong 40% CR                                                        | CEVC   | Upregulated | (13) |
| rno-miR-26a     | lifelong 40% CR                                                        | CEVC   | Upregulated | (13) |
| rno-miR-542-5p  | lifelong 40% CR                                                        | CEVC   | Upregulated | (13) |
| rno-miR-152     | lifelong 40% CR                                                        | CEVC   | Upregulated | (13) |
| rno-miR-26b     | lifelong 40% CR                                                        | CEVC   | Upregulated | (13) |
| rno-miR-186     | lifelong 40% CR                                                        | CEVC   | Upregulated | (13) |
| rno-miR-20a     | lifelong 40% CR                                                        | CEVC   | Upregulated | (13) |
| rno-miR-126     | lifelong 40% CR                                                        | CEVC   | Upregulated | (13) |
| rno-miR-29c     | lifelong 40% CR                                                        | CEVC   | Upregulated | (13) |
| rno-miR-192     | lifelong 40% CR                                                        | CEVC   | Upregulated | (13) |
| rno-miR-30e     | lifelong 40% CR                                                        | CEVC   | Upregulated | (13) |
| rno-miR-301b    | lifelong 40% CR                                                        | CEVC   | Upregulated | (13) |
| rno-miR-101a    | lifelong 40% CR                                                        | CEVC   | Upregulated | (13) |
| rno-miR-210     | lifelong 40% CR                                                        | CEVC   | Upregulated | (13) |
| rno-miR-106b    | lifelong 40% CR                                                        | CEVC   | Upregulated | (13) |
| rno-miR-449a    | lifelong 40% CR                                                        | CEVC   | Upregulated | (13) |
| rno-miR-17      | lifelong 40% CR                                                        | CEVC   | Upregulated | (13) |
| rno-miR-130b    | lifelong 40% CR                                                        | CEVC   | Upregulated | (13) |
| rno-miR-16      | lifelong 40% CR                                                        | CEVC   | Upregulated | (13) |
| rno-miR-19b     | lifelong 40% CR                                                        | CEVC   | Upregulated | (13) |
| rno-miR-503     | lifelong 40% CR                                                        | CEVC   | Upregulated | (13) |
| mml-miR-6529-5p | 30% restriction, starting at 10%                                       | Plasma | Upregulated | (9)  |
| mml-miR-21-5p   | 30% restriction, starting at 10%                                       | Plasma | Upregulated | (9)  |
| mml-miR-340-5p  | 30% restriction, starting at 10%                                       | Plasma | Upregulated | (9)  |
| mml-miR-130a-5p | 30% restriction, starting at 10%                                       | Plasma | Upregulated | (9)  |
| mml-miR-1260b   | 30% restriction, starting at 10%                                       | Plasma | Upregulated | (9)  |
| mml-miR-130b-5p | 30% restriction, starting at 10%                                       | Plasma | Upregulated | (9)  |
| mml-miR-411-5p  | 30% restriction, starting at 10%                                       | Plasma | Upregulated | (9)  |
| mml-miR-598-5p  | 30% restriction, starting at 10%                                       | Plasma | Upregulated | (9)  |
| mml-miR-500a-5p | 30% restriction, starting at 10%                                       | Plasma | Upregulated | (9)  |
| mml-miR-501-5p  | 30% restriction, starting at 10%                                       | Plasma | Upregulated | (9)  |
| mml-miR-122a-5p | 30% restriction, starting at 10%                                       | Plasma | Upregulated | (9)  |
| mml-miR-337-5p  | 30% restriction, starting at 10%                                       | Plasma | Upregulated | (9)  |
| hsa-miR-1-3p    | 7-day weight maintenance (WM) period was followed by 28 days of 30% ER | Serum  | Upregulated | (14) |
| hsa-miR-133a-3p | 7-day weight maintenance (WM) period was followed by 28 days of 30% ER | Serum  | Upregulated | (14) |
| hsa-miR-133b    | 7-day weight maintenance (WM) period was followed by 28 days of 30% ER | Serum  | Upregulated | (14) |
| hsa-miR-206     | 7-day weight maintenance (WM) period was followed by 28 days of 30% ER | Serum  | Upregulated | (14) |

1. Kogure A, Uno M, Ikeda T, Nishida E. The microRNA machinery regulates fasting-induced changes in gene expression and longevity in *Caenorhabditis elegans*. *The Journal of biological chemistry* 2017;292(27):11300-9. doi: 10.1074/jbc.M116.765065.
2. Garcia-Segura L, Abreu-Goodger C, Hernandez-Mendoza A, Dimitrova Dinkova TD, Padilla-Noriega L, Perez-Andrade ME, Miranda-Rios J. High-Throughput Profiling of *Caenorhabditis elegans* Starvation-Responsive microRNAs. *PLoS One* 2015;10(11):e0142262. doi: 10.1371/journal.pone.0142262.
3. Barrio L, Dekanty A, Milan M. MicroRNA-mediated regulation of Dp53 in the *Drosophila* fat body contributes to metabolic adaptation to nutrient deprivation. *Cell reports* 2014;8(2):528-41. doi: 10.1016/j.celrep.2014.06.020.
4. Dhahbi JM, Spindler SR, Atamna H, Yamakawa A, Guerrero N, Boffelli D, Mote P, Martin DI. Deep sequencing identifies circulating mouse miRNAs that are functionally implicated in manifestations of aging and responsive to calorie restriction. *Aging* 2013;5(2):130-41. doi: 10.18632/aging.100540.
5. Noren Hooten N, Martin-Montalvo A, Dluzen DF, Zhang Y, Bernier M, Zonderman AB, Becker KG, Gorospe M, de Cabo R, Evans MK. Metformin-mediated increase in DICER1 regulates microRNA expression and cellular senescence. *Aging Cell* 2016;15(3):572-81. doi: 10.1111/accel.12469.
6. Olivo-Marston SE, Hursting SD, Perkins SN, Schetter A, Khan M, Croce C, Harris CC, Lavigne J. Effects of calorie restriction and diet-induced obesity on murine colon carcinogenesis, growth and inflammatory factors, and microRNA expression. *PLoS One* 2014;9(4):e94765. doi: 10.1371/journal.pone.0094765.
7. Khanna A, Muthusamy S, Liang R, Sarojini H, Wang E. Gain of survival signaling by down-regulation of three key miRNAs in brain of calorie-restricted mice. *Aging* 2011;3(3):223-36. doi: 10.18632/aging.100276.
8. Devlin KL, Sanford T, Harrison LM, LeBourgeois P, Lashinger LM, Mambo E, Hursting SD. Stage-Specific MicroRNAs and Their Role in the Anticancer Effects of Calorie Restriction in a Rat Model of ER-Positive Luminal Breast Cancer. *PLoS One* 2016;11(7):e0159686. doi: 10.1371/journal.pone.0159686.
9. Schneider A, Dhahbi JM, Atamna H, Clark JP, Colman RJ, Anderson RM. Caloric restriction impacts plasma microRNAs in rhesus monkeys. *Aging Cell* 2017;16(5):1200-3. doi: 10.1111/accel.12636.
10. Gendron CM, Pletcher SD. MicroRNAs mir-184 and let-7 alter *Drosophila* metabolism and longevity. *Aging Cell* 2017;16(6):1434-8. doi: 10.1111/accel.12673.
11. Orom UA, Lim MK, Savage JE, Jin L, Saleh AD, Lisanti MP, Simone NL. MicroRNA-203 regulates caveolin-1 in breast tissue during caloric restriction. *Cell cycle (Georgetown, Tex)* 2012;11(7):1291-5. doi: 10.4161/cc.19704.
12. Victoria B, Dhahbi JM, Nunez Lopez YO, Spinel L, Atamna H, Spindler SR, Masternak MM. Circulating microRNA signature of genotype-by-age interactions in the long-lived Ames dwarf mouse. *Aging Cell* 2015;14(6):1055-66. doi: 10.1111/accel.12373.
13. Csiszar A, Gautam T, Sosnowska D, Tarantini S, Banki E, Tucsek Z, Toth P, Losonczy G, Koller A, Reglodi D, et al. Caloric restriction confers persistent anti-oxidative, pro-angiogenic, and anti-inflammatory effects and promotes anti-aging miRNA expression

- profile in cerebrovascular endothelial cells of aged rats. *Am J Physiol Heart Circ Physiol* 2014;307(3):H292-306. doi: 10.1152/ajpheart.00307.2014.
14. Margolis LM, Rivas DA, Pasiakos SM, McClung JP, Ceglia L, Fielding RA. Upregulation of circulating myomiR following short-term energy restriction is inversely associated with whole body protein synthesis. *American journal of physiology Regulatory, integrative and comparative physiology* 2017;313(3):R298-R304. doi: 10.1152/ajpregu.00054.2017.
